# Supplementary material for: Clinical implementation of single-cell RNA sequencing using liver fine needle aspirate tissue sampling and centralized processing captures compartment specific immuno-diversity
Source: bioRxiv or medRxiv preprint supplement (doi:10.1101/2021.11.30.470634), 2021-12-02

# Suppl Fig 1. FNA Quality Control Gating Strategy

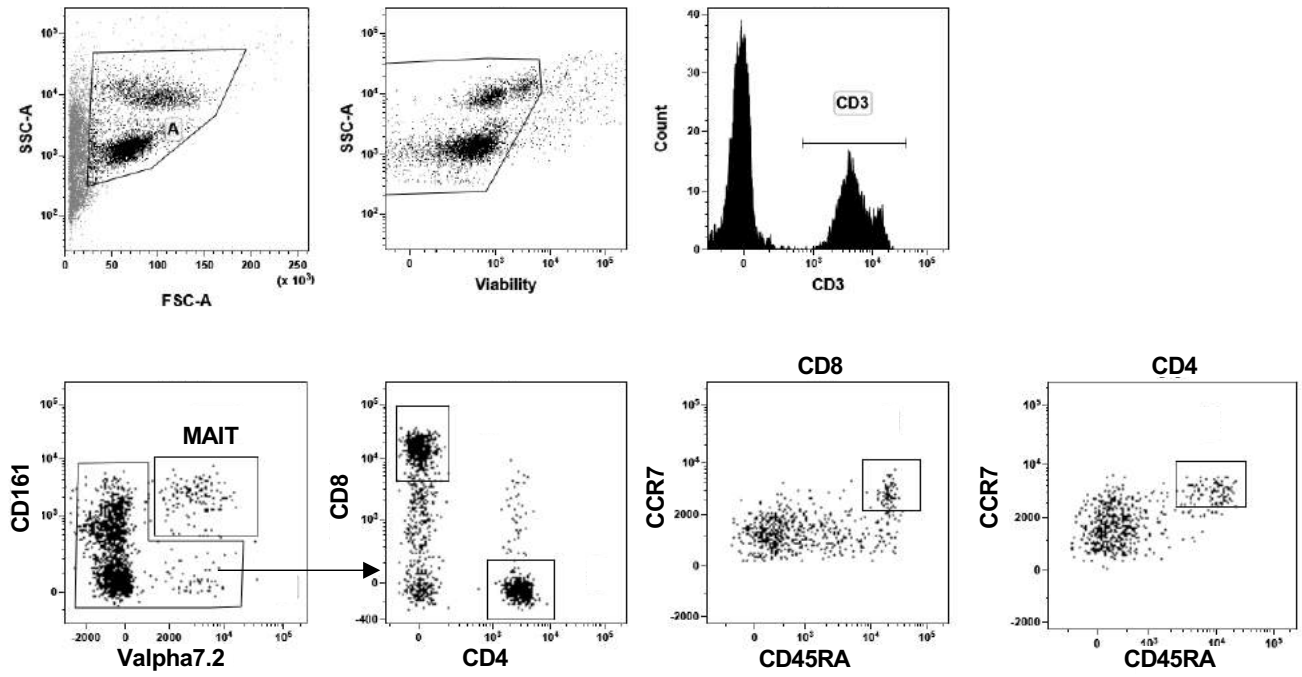

# Suppl Figure 2. scRNAseq QC metrics

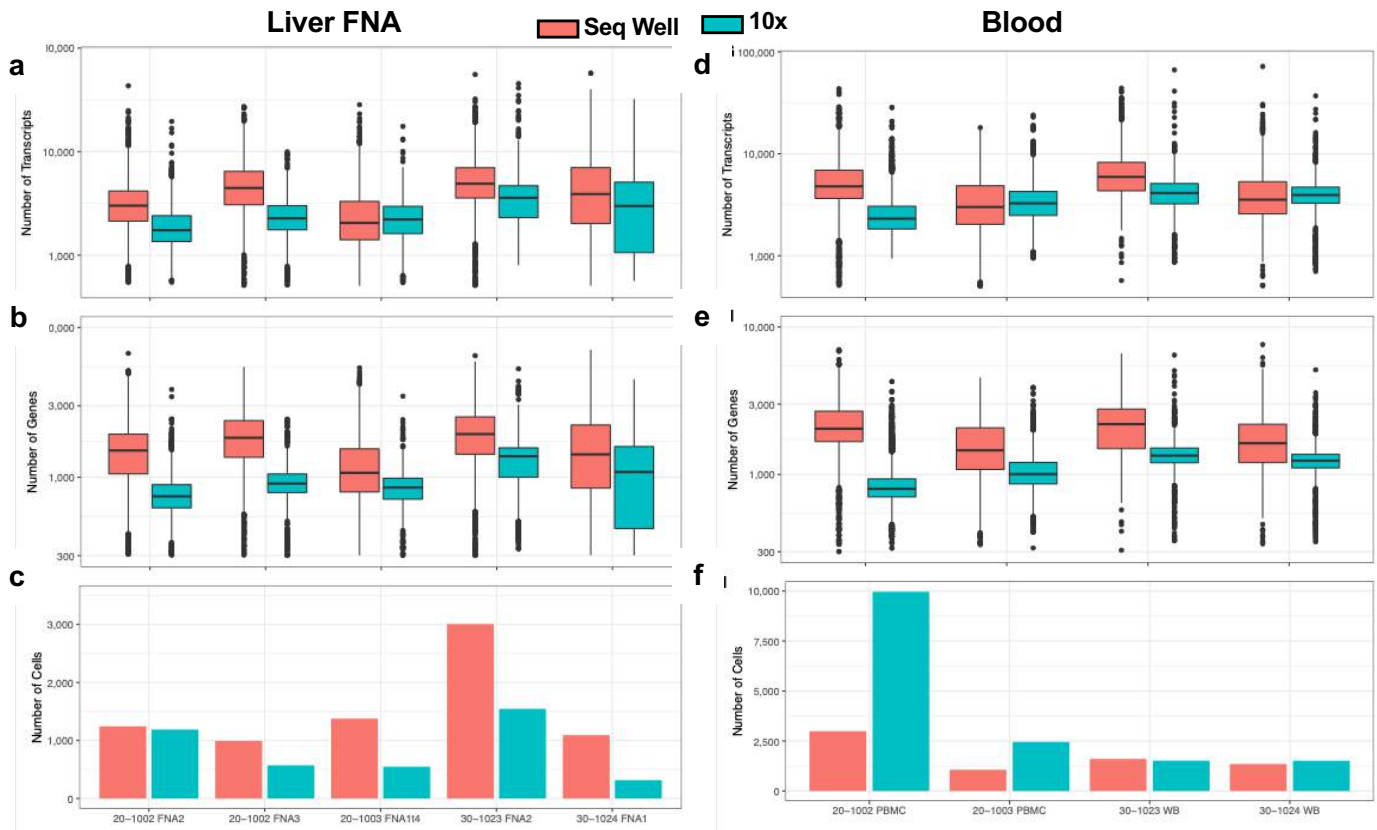

# Suppl Figure 3. CD4+ T cells

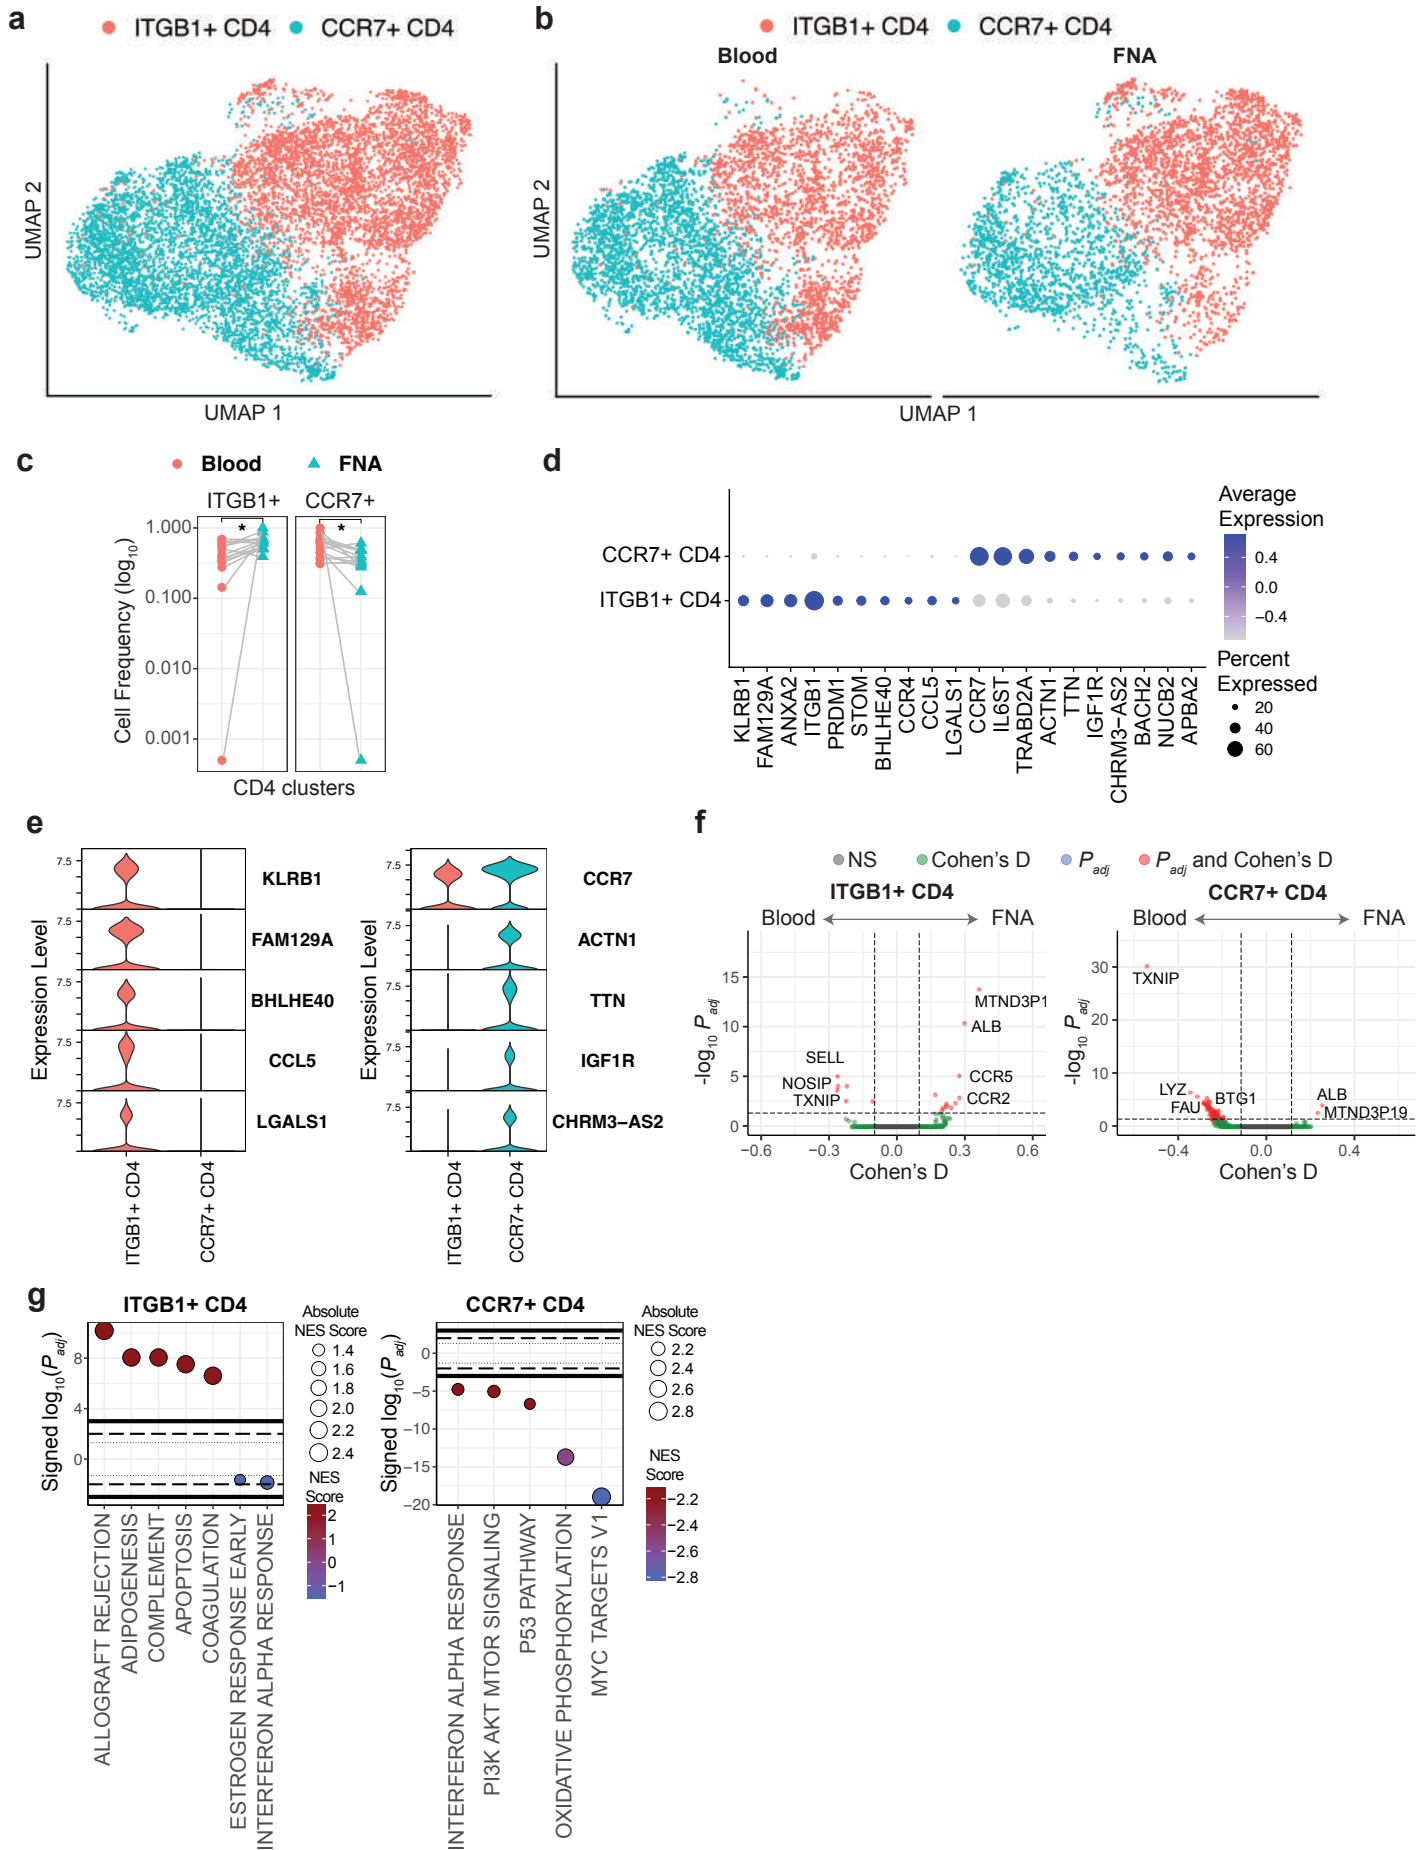

# Suppl Figure 4. NK cells

**a** ● NCAM1-bright EOMES+ ● NCAM1-dim GNLY+

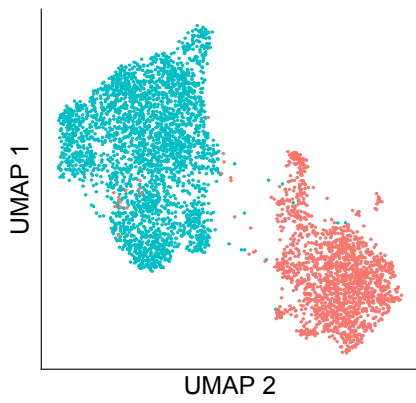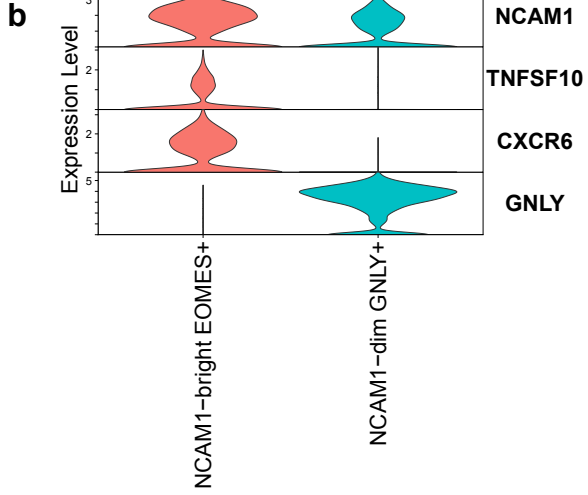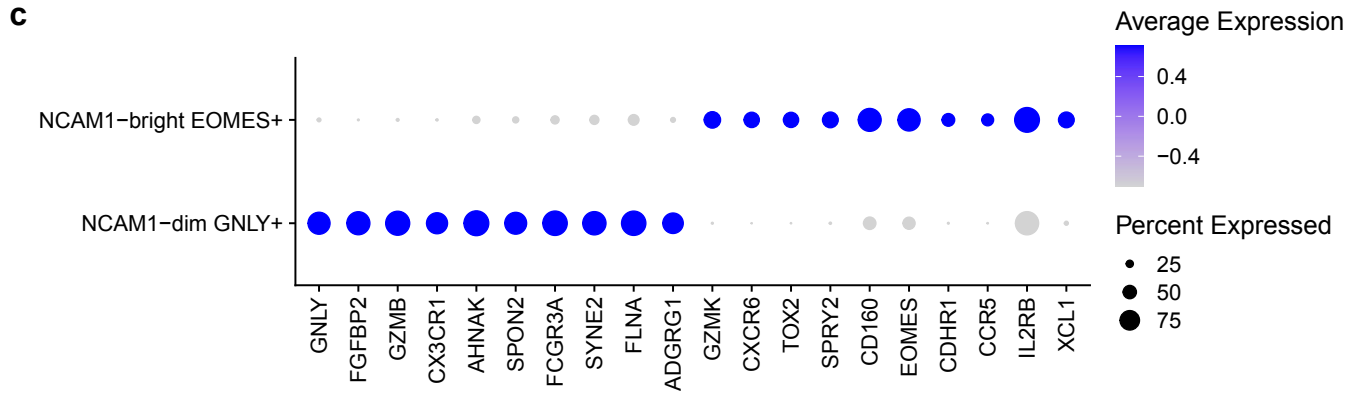

**d** ● NCAM1-bright EOMES+ ● NCAM1-dim GNLY+

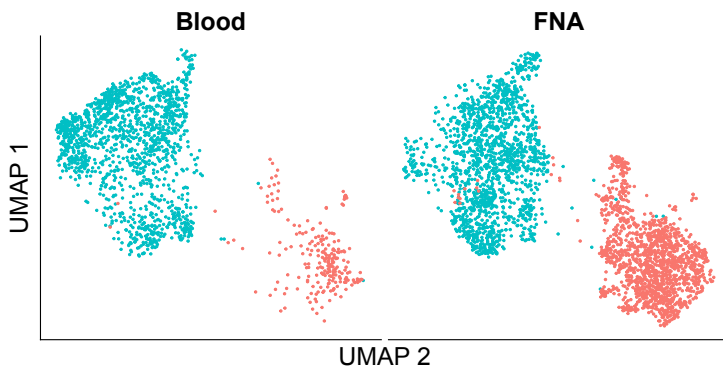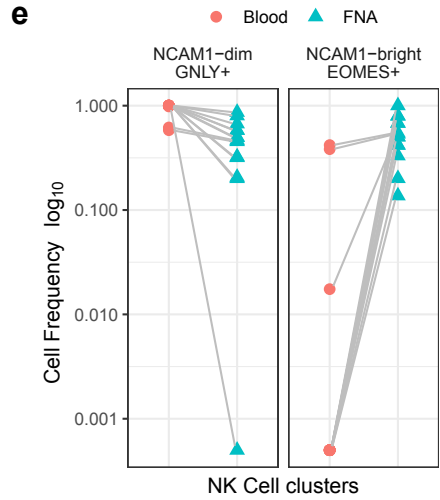

**f** ● NS ● Cohen's D ●  $P_{adj}$  and Cohen's D

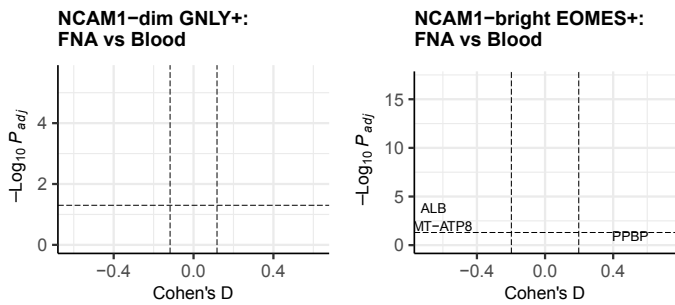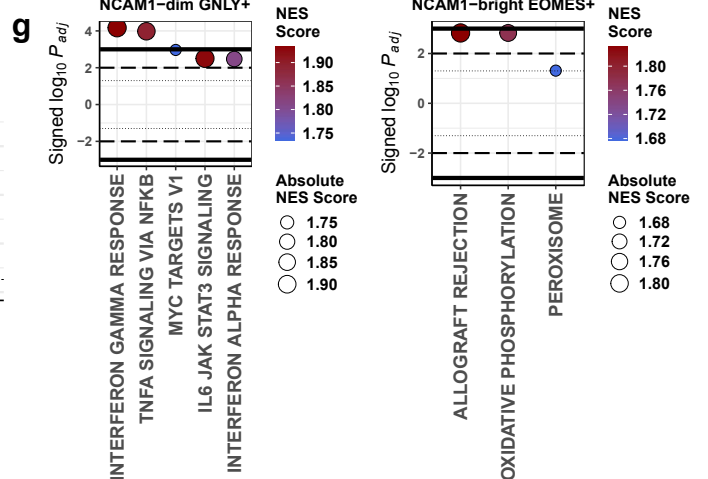

# Suppl Figure 5. B cells

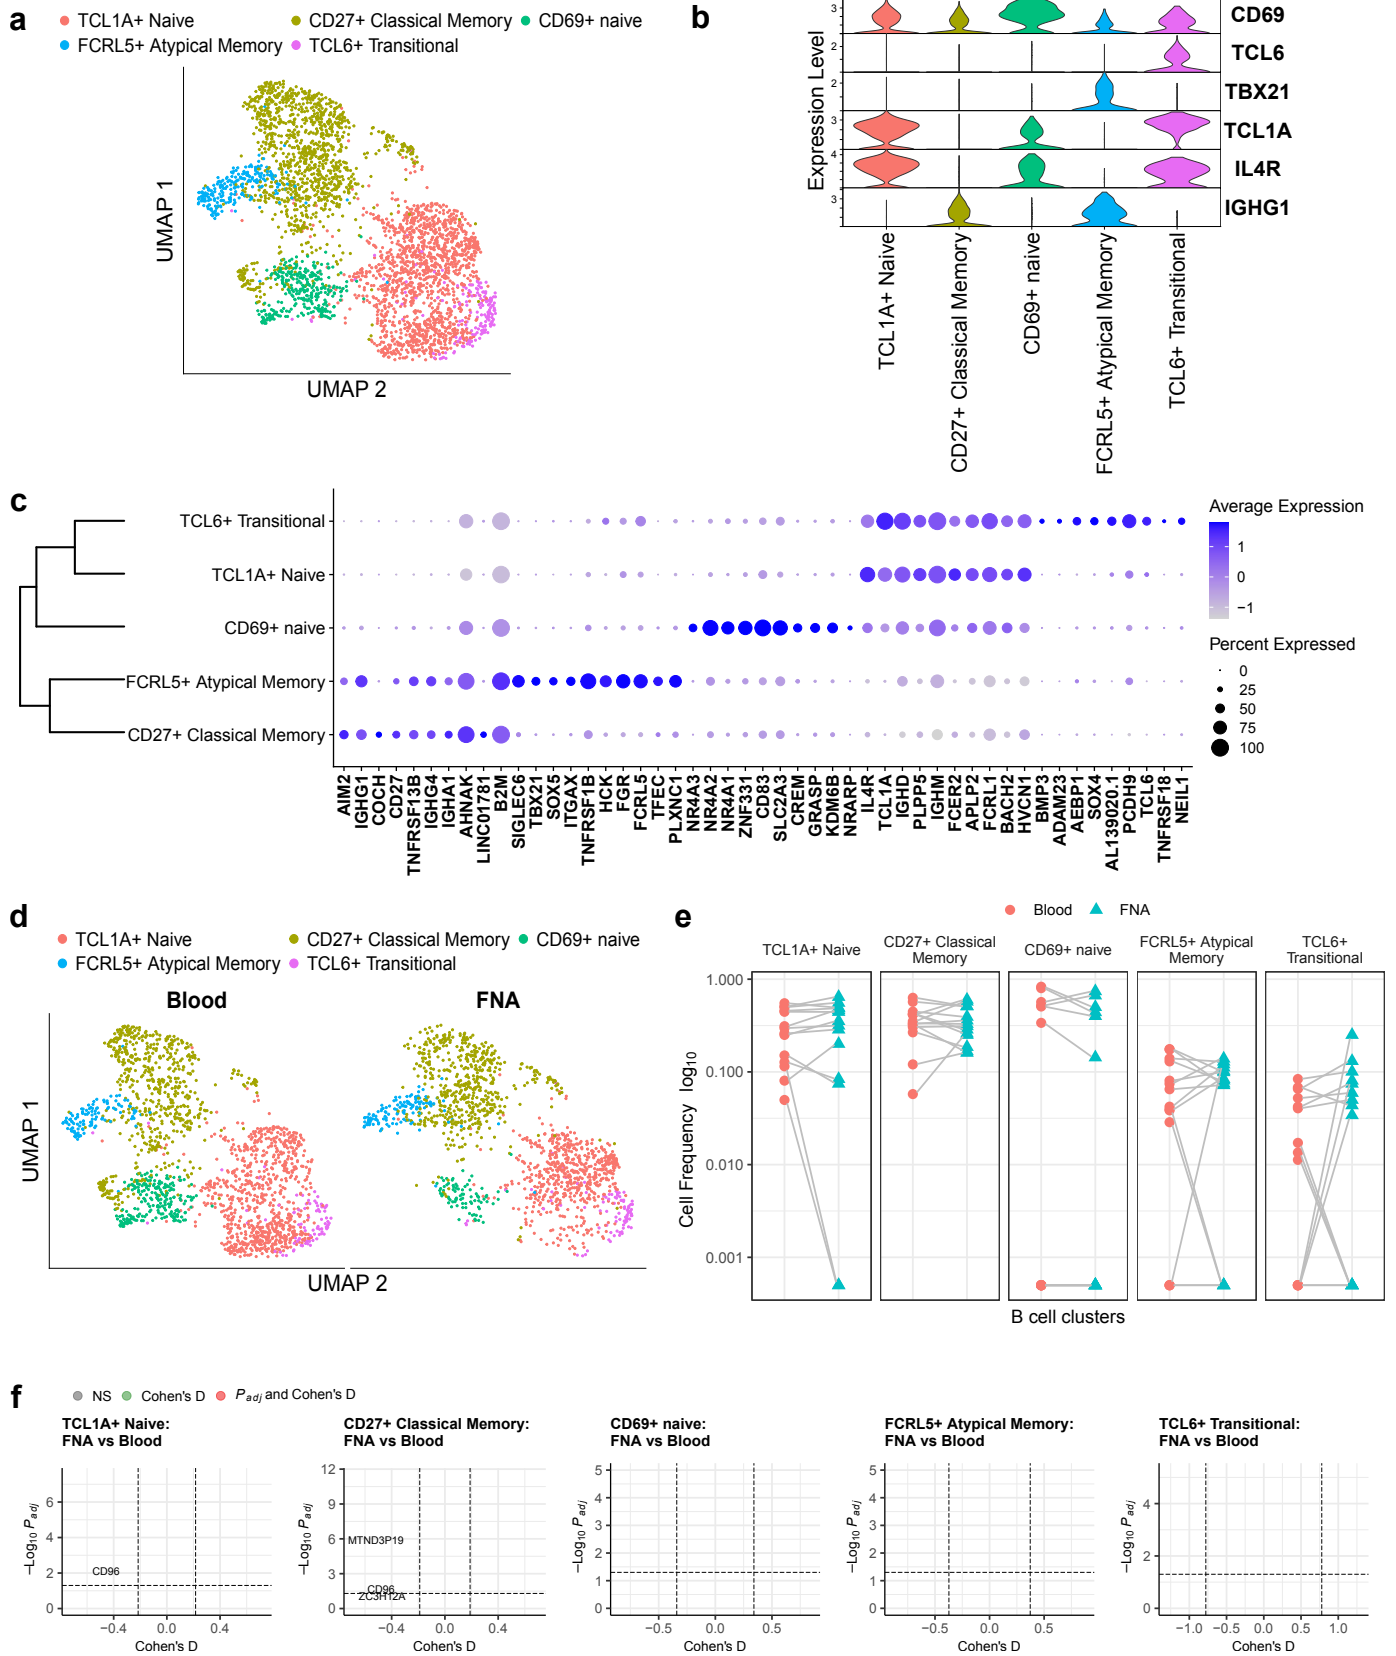

# Suppl Figure 6. Monocytes

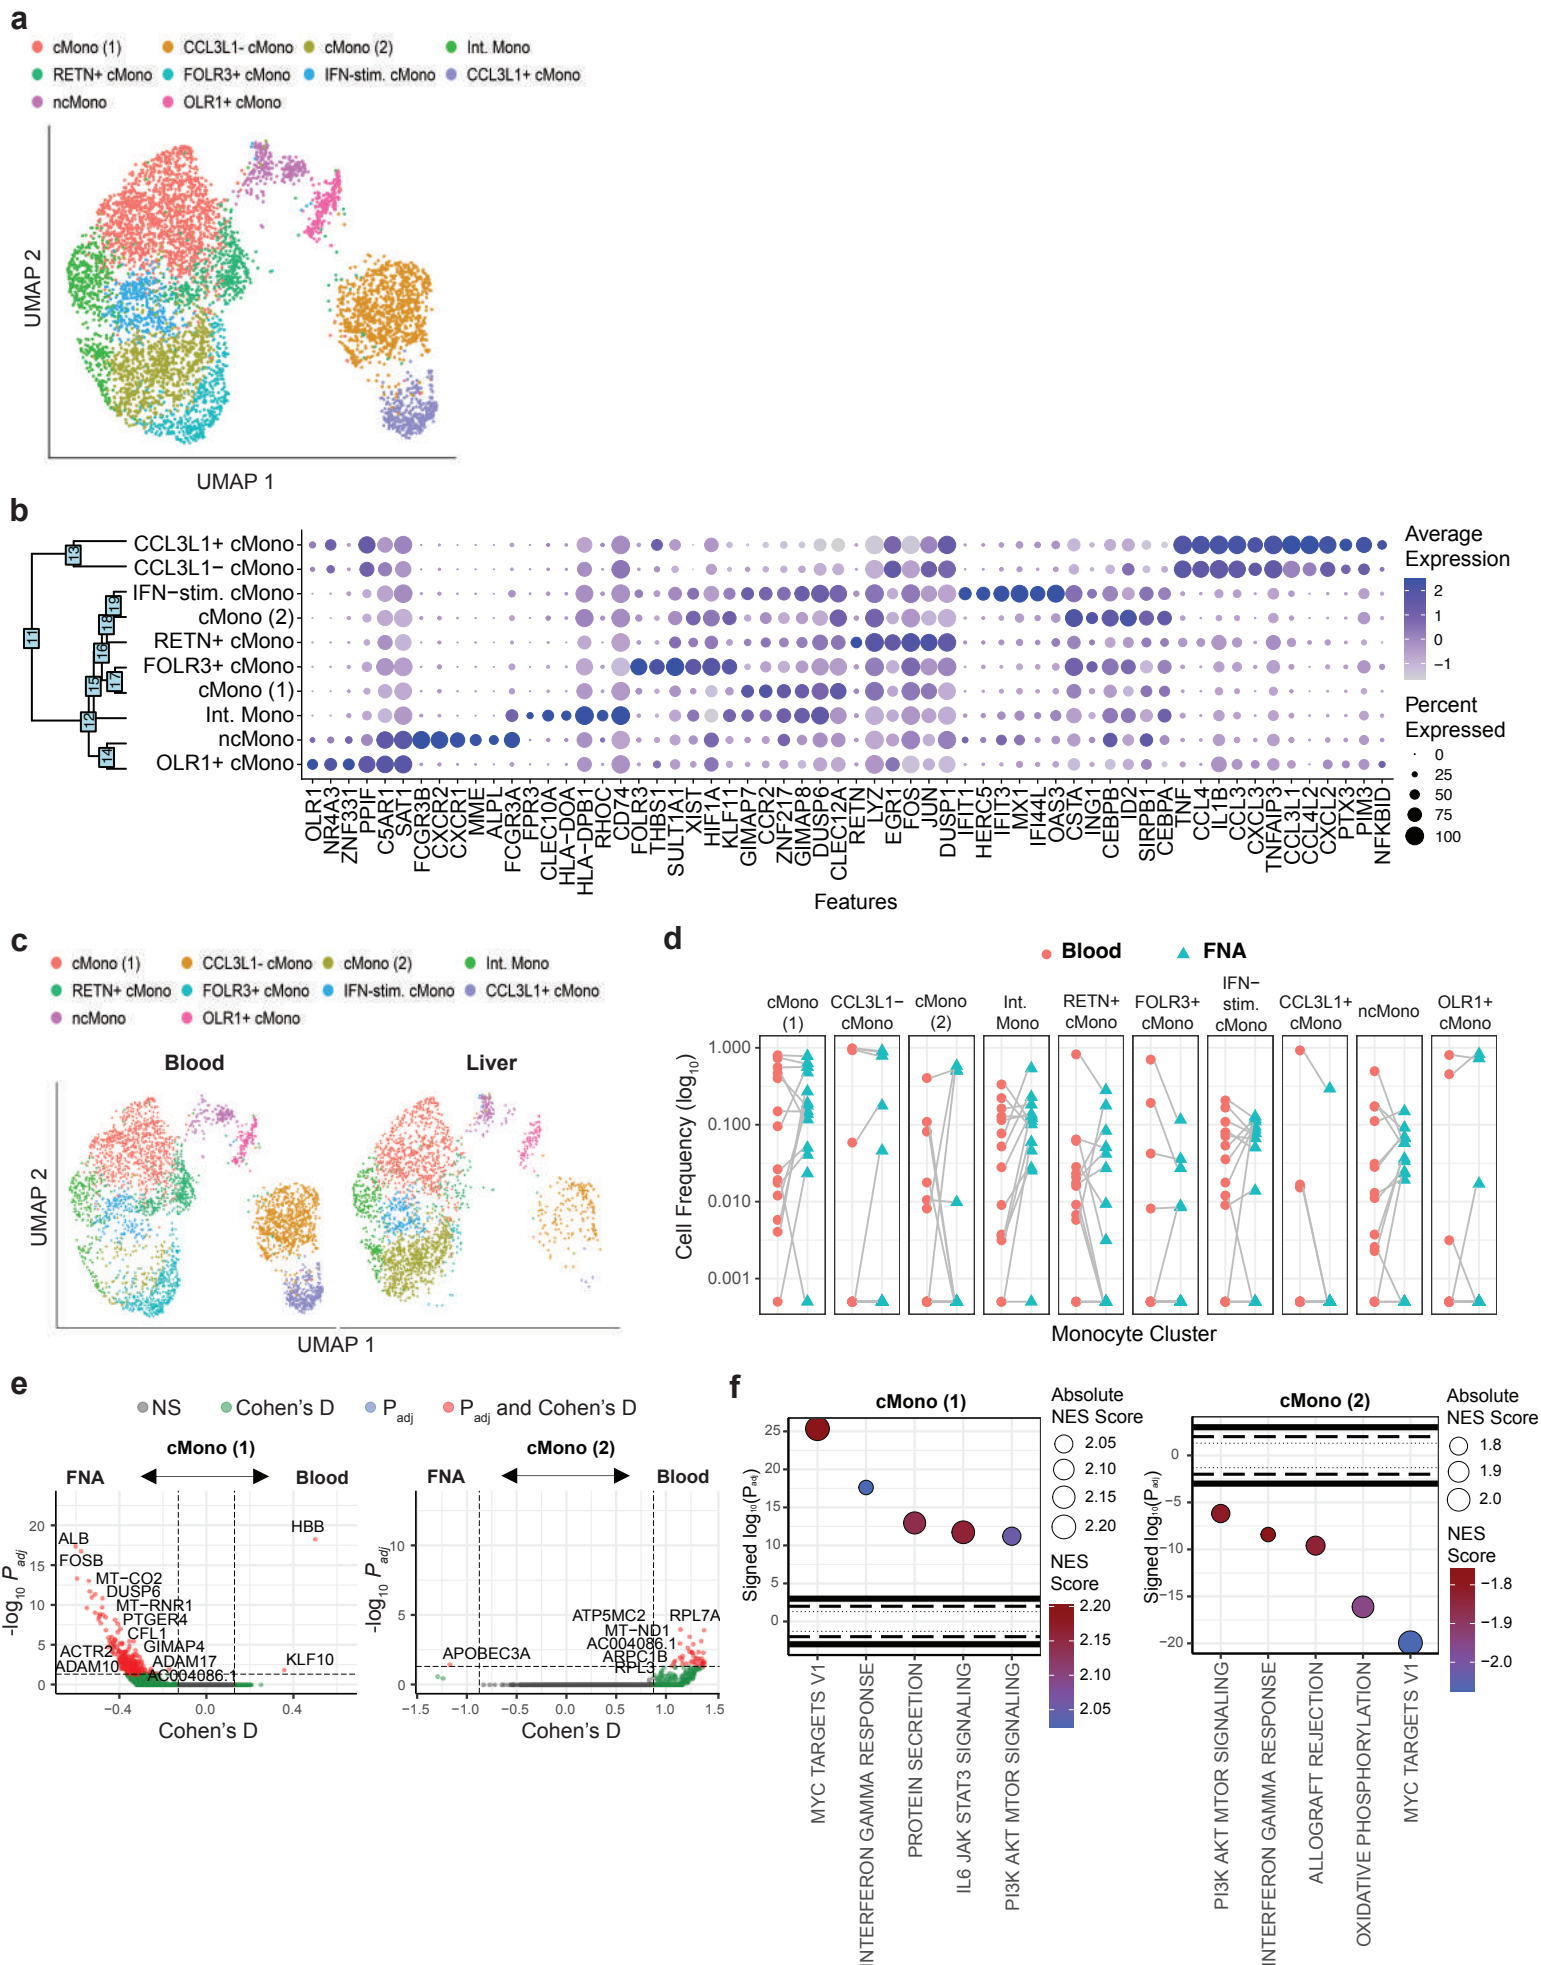

Supplement: Supplementary file [file media-1.pdf]
